# Supplementary material
Source: PubMed Central journal article supplement (PMC3475258)
Supplement: supp_fj.12-212282_12-212282SuppFigs.pdf [file supp_fj.12-212282_12-212282SuppFigs.pdf]

# Figure S1

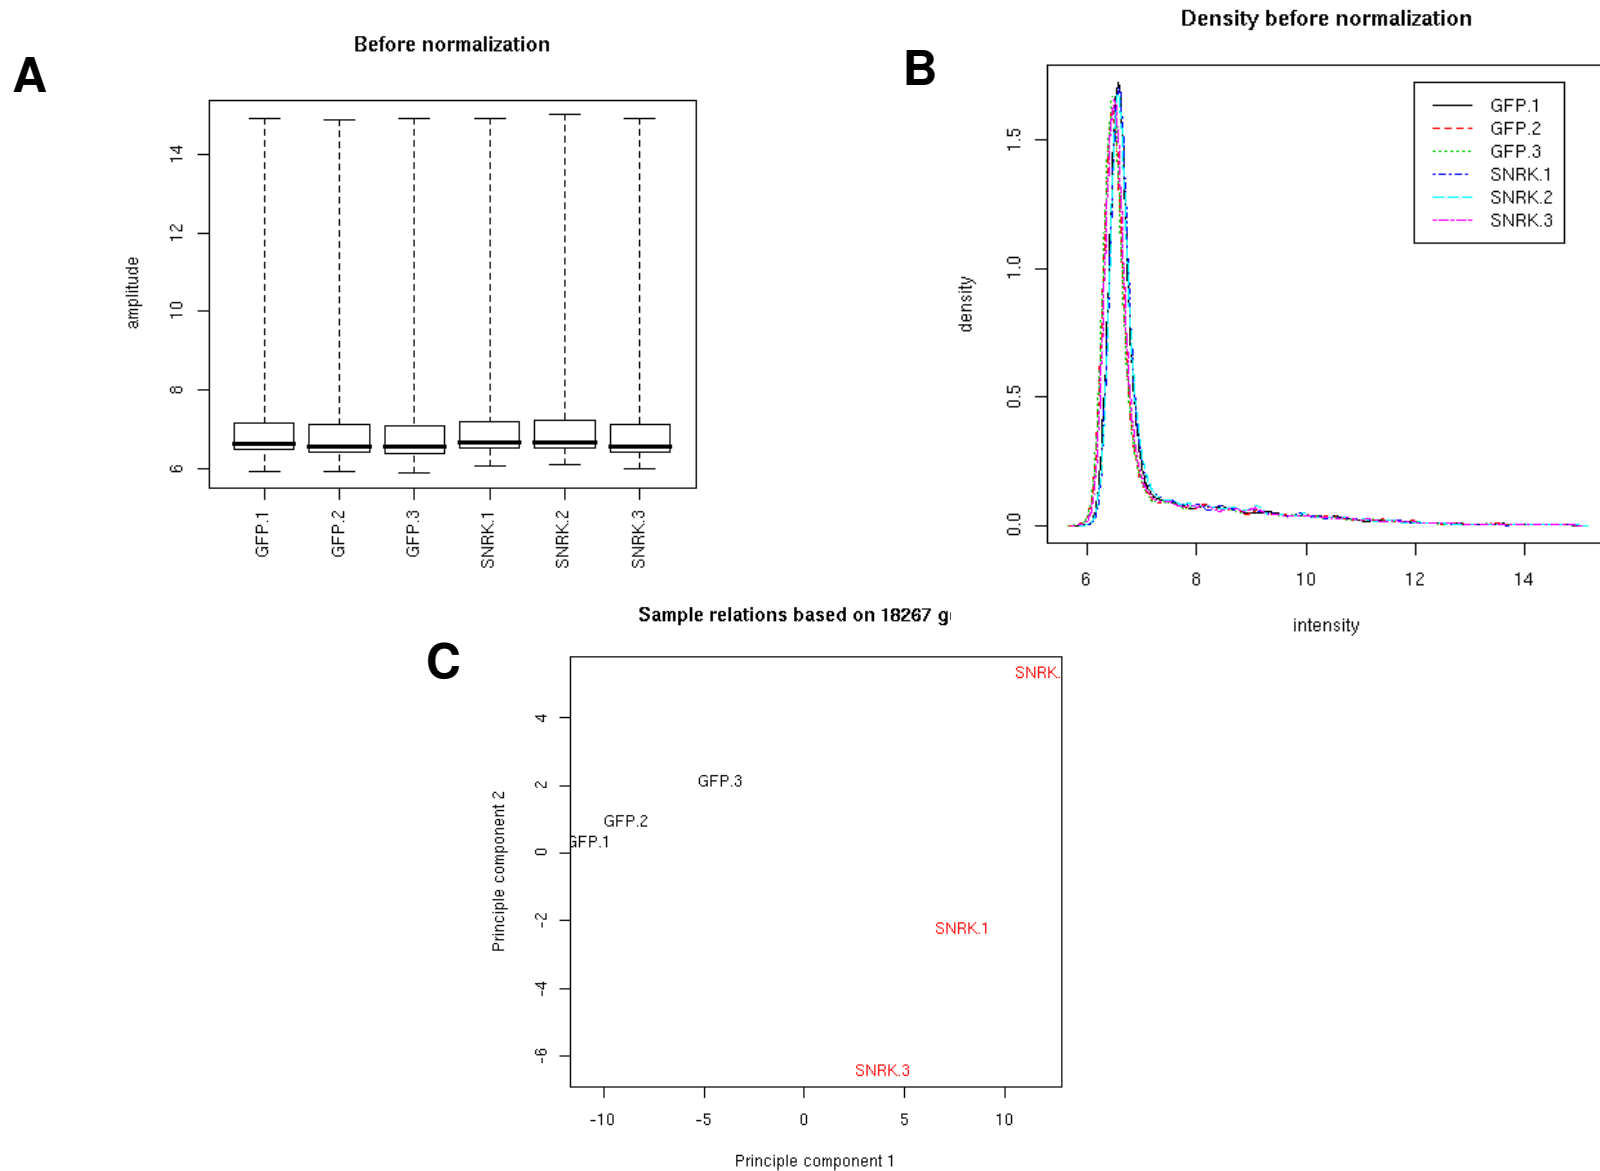

**Figure S1.** Quality control and relations of the samples used in the gene array analysis. *A* and *B*) Quality control analysis based on the control probe information and quality control plots. *C*) To illustrate the relationships among the arrays, as inferred by the distance from a genome-wide transcription survey, arrays were clustered before analysis.

Figure S2

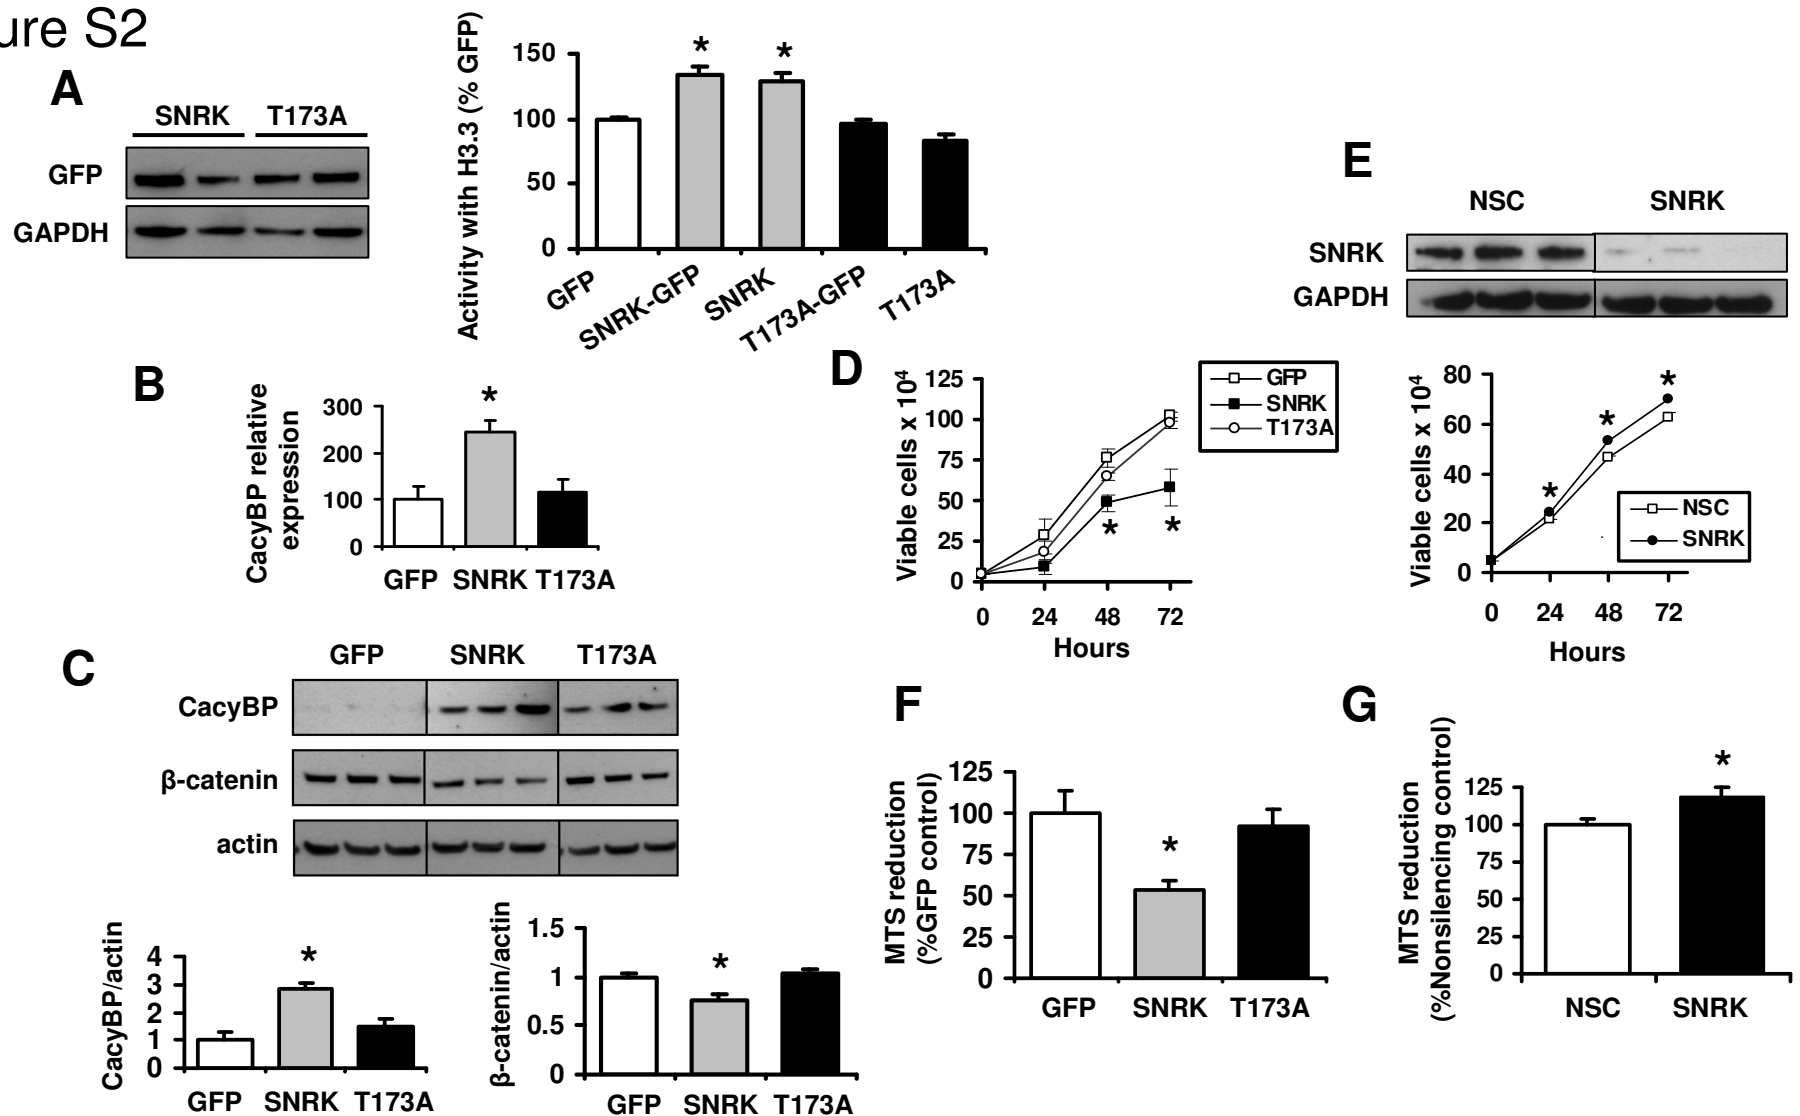

**Figure S2.** SNRK increases CacyBP levels and decreases  $\beta$ -catenin protein and proliferation in HEK293 cells. *A*) Expression and activity of SNRK and T173A in HEK293 cells.  $n \geq 3$ . *B*) Levels of CacyBP mRNA with overexpression of SNRK or controls in HEK293 cells.  $n = 3$ . *C*) Levels of CacyBP protein and  $\beta$ -catenin protein in HEK293 cells with overexpression of SNRK or controls. Lanes from the same gel have been rearranged for clarity.  $n = 3$ . *D*) Proliferation in transfected HEK293 cells as measured by viable cell number.  $n = 3$ . *E*) Western blots of SNRK protein, and proliferation as measured by viable cell number in HEK293 cells treated with SNRK or nonsilencing control (NSC) shRNA. Lanes from the same gel have been rearranged for clarity. *F*) Proliferation in transfected HEK293 cells as measured by MTS reduction.  $n = 7$ . *G*) Proliferation with SNRK knockdown in HEK293 cells as measured by MTS reduction.  $n = 3$ . \*  $p < 0.05$  vs. GFP and T173A or vs. NSC.

Figure S3

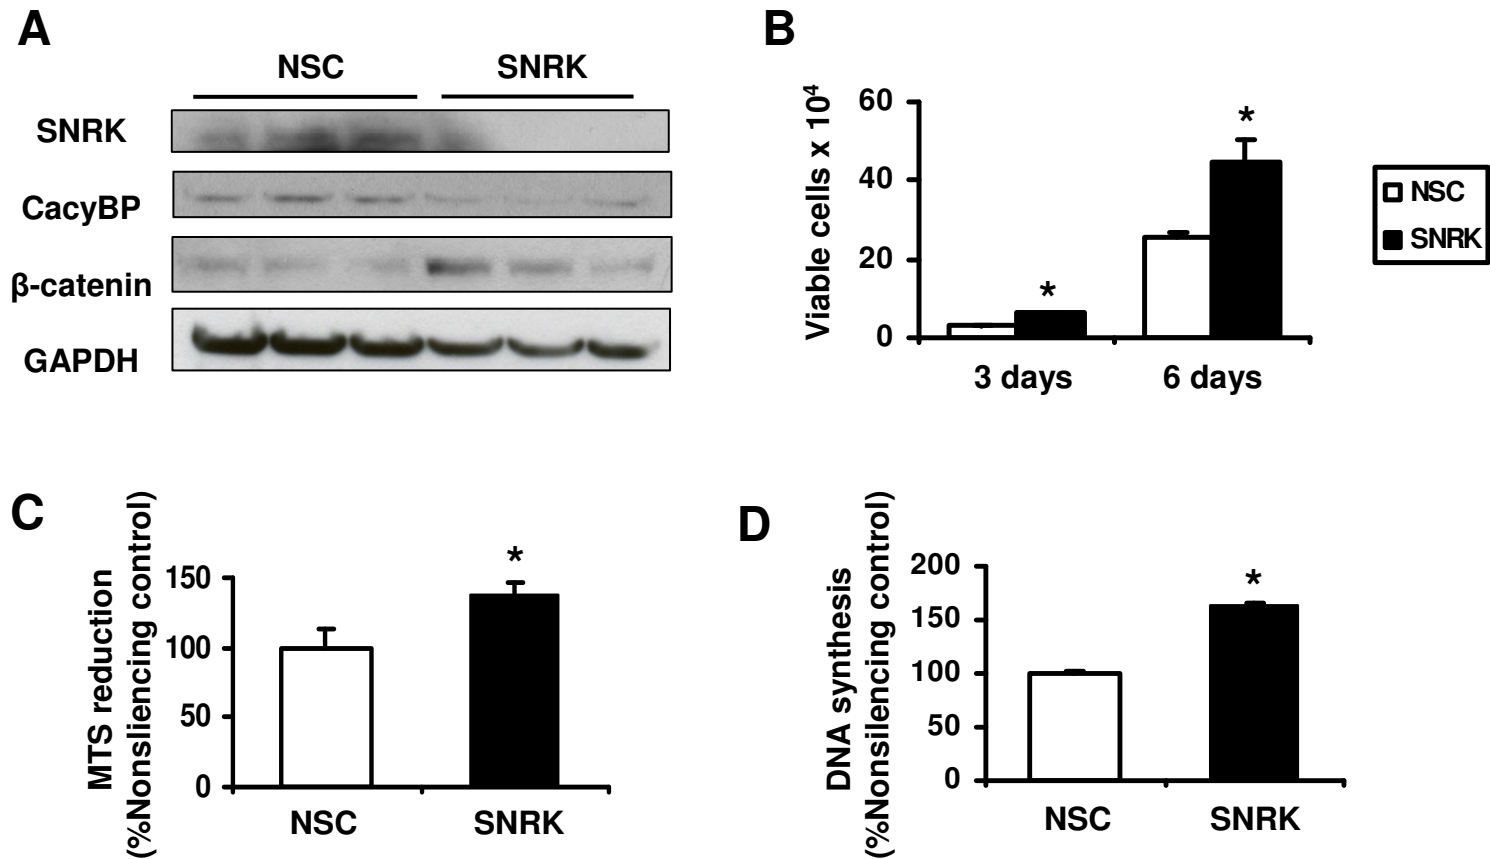

**Figure S3.** Stable knockdown of SNRK in RKO cells reduces CacyBP and increases  $\beta$ -catenin and cell proliferation. *A*) Western blots for SNRK, CacyBP,  $\beta$ -catenin, and GAPDH in RKO cells with stable knockdown of SNRK or with nonsilencing control (NSC) shRNA. *B*) Viable cell number in RKO cells with stable SNRK knockdown as determined by cell counting with Trypan Blue exclusion at 3 and 6 days.  $n=6$ . *C*) MTS reduction in RKO cells with stable SNRK knockdown after 6 days of growth.  $n=6$ . *D*) BrdU incorporation for 24 hours in RKO cells with stable SNRK knockdown.  $n=6$ . \*  $p < 0.05$  vs. NSC.

# Tables S1-S3

**S1**

| Genes with the smallest p-values - induction:   |                                                                             |             |          |            |
|-------------------------------------------------|-----------------------------------------------------------------------------|-------------|----------|------------|
| Gene symbol                                     | Gene name                                                                   | Fold change | p-value  | FDR        |
| APP                                             | amyloid beta (A4) precursor protein (peptidase nexin-II, Alzheimer disease) | 2.22713289  | 2.37E-08 | 0.00014442 |
| LOC644695                                       | hypothetical LOC644695                                                      | 1.54645886  | 1.56E-07 | 0.00015812 |
| C6orf125                                        | chromosome 6 open reading frame 125                                         | 1.66041491  | 1.61E-07 | 0.00015812 |
| ARHGAP19                                        | Rho GTPase activating protein 19                                            | 1.94579127  | 7.05E-07 | 0.00049516 |
| C20orf52                                        | chromosome 20 open reading frame 52                                         | 1.53865966  | 8.26E-07 | 0.00053622 |
| WDR79                                           | WD repeat domain 79                                                         | 1.54103949  | 2.35E-06 | 0.00113898 |
| ITPK1                                           | inositol 1,3,4-triphosphate 5/6 kinase                                      | 1.51397702  | 3.25E-06 | 0.00138161 |
| CACYBP                                          | calcyclin binding protein                                                   | 1.59911286  | 3.97E-06 | 0.00154653 |
| UNC45A                                          | unc-45 homolog A (C. elegans)                                               | 1.60265752  | 4.15E-06 | 0.00154653 |
| LARP5                                           | La ribonucleoprotein domain family, member 5                                | 1.51988305  | 4.90E-06 | 0.00162618 |
| STX10                                           | syntaxin 10                                                                 | 1.52749637  | 6.62E-06 | 0.00202089 |
| ARID3A                                          | AT rich interactive domain 3A (BRIGHT-like)                                 | 1.68621871  | 7.50E-06 | 0.00207596 |
| MTF1                                            | metal-regulatory transcription factor 1                                     | 1.90735052  | 1.45E-05 | 0.0030534  |
| VAT1                                            | vesicle amine transport protein 1 homolog (T. californica)                  | 1.56974703  | 1.82E-05 | 0.00353096 |
| ATP1A1                                          | ATPase, Na+/K+ transporting, alpha 1 polypeptide                            | 1.70208823  | 2.76E-05 | 0.00430463 |
| LOC130773                                       | similar to 60S ribosomal protein L23a                                       | 1.640351    | 4.05E-05 | 0.00506342 |
| MGAT4B                                          | mannosyl (alpha-1,3-)-glycoprotein beta-1,4-N-AGT, isozyme B                | 1.59709588  | 4.82E-05 | 0.00550588 |
| SUPT6H                                          | suppressor of Ty 6 homolog (S. cerevisiae)                                  | 1.77100828  | 5.16E-05 | 0.00578718 |
| SORBS3                                          | sorbin and SH3 domain containing 3                                          | 1.73519754  | 5.44E-05 | 0.00592268 |
| JOSD2                                           | Josephin domain containing 2                                                | 1.65068674  | 6.33E-05 | 0.00631489 |
| Genes with the smallest p-values - suppression: |                                                                             |             |          |            |
| Gene symbol                                     | Gene name                                                                   | Fold change | p-value  | FDR        |
| VTI1A                                           | vesicle transport through interaction with t-SNAREs homolog 1A (yeast)      | -3.0745586  | 2.18E-09 | 3.98E-05   |
| RFX3                                            | regulatory factor X, 3 (influences HLA class II expression)                 | -2.3150485  | 4.01E-08 | 0.00014532 |
| LOC339240                                       | keratin pseudogene                                                          | -2.1923235  | 6.50E-08 | 0.00015812 |
| TMEM186                                         | transmembrane protein 186                                                   | -2.0703648  | 1.33E-07 | 0.00015812 |
| C1orf130                                        | chromosome 1 open reading frame 130                                         | -5.4386983  | 1.39E-07 | 0.00015812 |
| B3GNT8                                          | UDP-GlcNAc:betaGal beta-1,3-N-acetylgucosaminyltransferase 8                | -2.1762886  | 1.81E-07 | 0.00016538 |
| STK32B                                          | serine/threonine kinase 32B                                                 | -2.755595   | 1.94E-07 | 0.00016887 |
| KCNJ4                                           | potassium inwardly-rectifying channel, subfamily J, member 4                | -1.6392272  | 5.24E-07 | 0.00041643 |
| FOXD4L4                                         | forkhead box D4-like 4                                                      | -1.9925315  | 8.51E-07 | 0.00053622 |
| LOC644151                                       | similar to calpain 8                                                        | -2.3207326  | 1.15E-06 | 0.00070184 |
| STRN                                            | striatin, calmodulin binding protein                                        | -1.8677273  | 1.55E-06 | 0.00091625 |
| KIAA0774                                        | KIAA0774                                                                    | -2.0827202  | 1.90E-06 | 0.00099033 |
| CALN1                                           | calneuron 1                                                                 | -1.5863672  | 2.43E-06 | 0.00113898 |
| DLK2                                            | delta-like 2 homolog (Drosophila)                                           | -1.5245633  | 2.50E-06 | 0.00114086 |
| ZNF180                                          | zinc finger protein 180                                                     | -1.9272154  | 2.57E-06 | 0.00114717 |
| SBF1                                            | SET binding factor 1                                                        | -1.5837656  | 7.18E-06 | 0.00207596 |
| KCNV2                                           | potassium channel, subfamily V, member 2                                    | -1.7284786  | 9.78E-06 | 0.00252145 |
| CAPN6                                           | calpain 6                                                                   | -1.6409959  | 1.37E-05 | 0.00299865 |
| SCAP                                            | SREBF chaperone                                                             | -1.7264415  | 1.89E-05 | 0.00359919 |
| TINF2                                           | TERF1 (TRF1)-interacting nuclear factor 2                                   | -1.5908685  | 2.53E-05 | 0.00416009 |

**S2**

| GO.Term                                         | p-value    | significant gene number | increase ~ decrease |
|-------------------------------------------------|------------|-------------------------|---------------------|
| DNA binding                                     | 2.99E-05   | 125                     | 71 ~ 55             |
| transcription factor binding                    | 3.35E-05   | 35                      | 21 ~ 16             |
| RNA polymerase II transcription factor activity | 0.0002809  | 6                       | 3 ~ 3               |
| transcription coactivator activity              | 0.00071647 | 18                      | 10 ~ 10             |
| pyrroline-5-carboxylate reductase activity      | 0.00078151 | 3                       | 2 ~ 1               |

**S3**

| GO.Term                                | p-value    | significant gene number | increase ~ decrease |
|----------------------------------------|------------|-------------------------|---------------------|
| nucleus                                | 1.69E-09   | 188                     | 111 ~ 80            |
| intracellular membrane-bound organelle | 4.61E-09   | 283                     | 174 ~ 112           |
| nuclear part                           | 4.83E-08   | 70                      | 39 ~ 33             |
| intracellular part                     | 4.92E-08   | 396                     | 236 ~ 163           |
| cell part                              | 4.59E-07   | 555                     | 304 ~ 254           |
| intracellular organelle                | 4.70E-07   | 316                     | 190 ~ 129           |
| nuclear lumen                          | 2.35E-05   | 42                      | 24 ~ 20             |
| nucleoplasm                            | 0.00022067 | 31                      | 19 ~ 14             |
| nuclear chromosome                     | 0.00091382 | 11                      | 8 ~ 3               |
| nucleoplasm part                       | 0.00093084 | 25                      | 15 ~ 12             |
| intracellular organelle part           | 0.00095558 | 127                     | 75 ~ 54             |

**Table S1.** List of top genes altered by SNRK-GFP vs. GFP overexpression in the microarray. Top genes were chosen from all genes with a false discovery rate (FDR) < 0.05, a p-value < 0.01 and a fold change larger than 1.5.

**Table S2.** Gene Ontology Analysis for the molecular function of genes altered in the microarray.

**Table S3.** Gene Ontology Analysis for the cellular location of genes altered in the microarray.
